# Supplementary material
Source: publisher site journal article supplement (https://www.spandidos-publications.com/3147/downloadSupplementary)

Figure S1. Protein expression levels in tissue samples from patients with chronic rhinosinusitis with nasal polyps. Green box, the lowest expression of MMP-2 and MMP-9; red box, the highest expression of MMP-2 and MMP-9. MMP, matrix metalloproteinase.

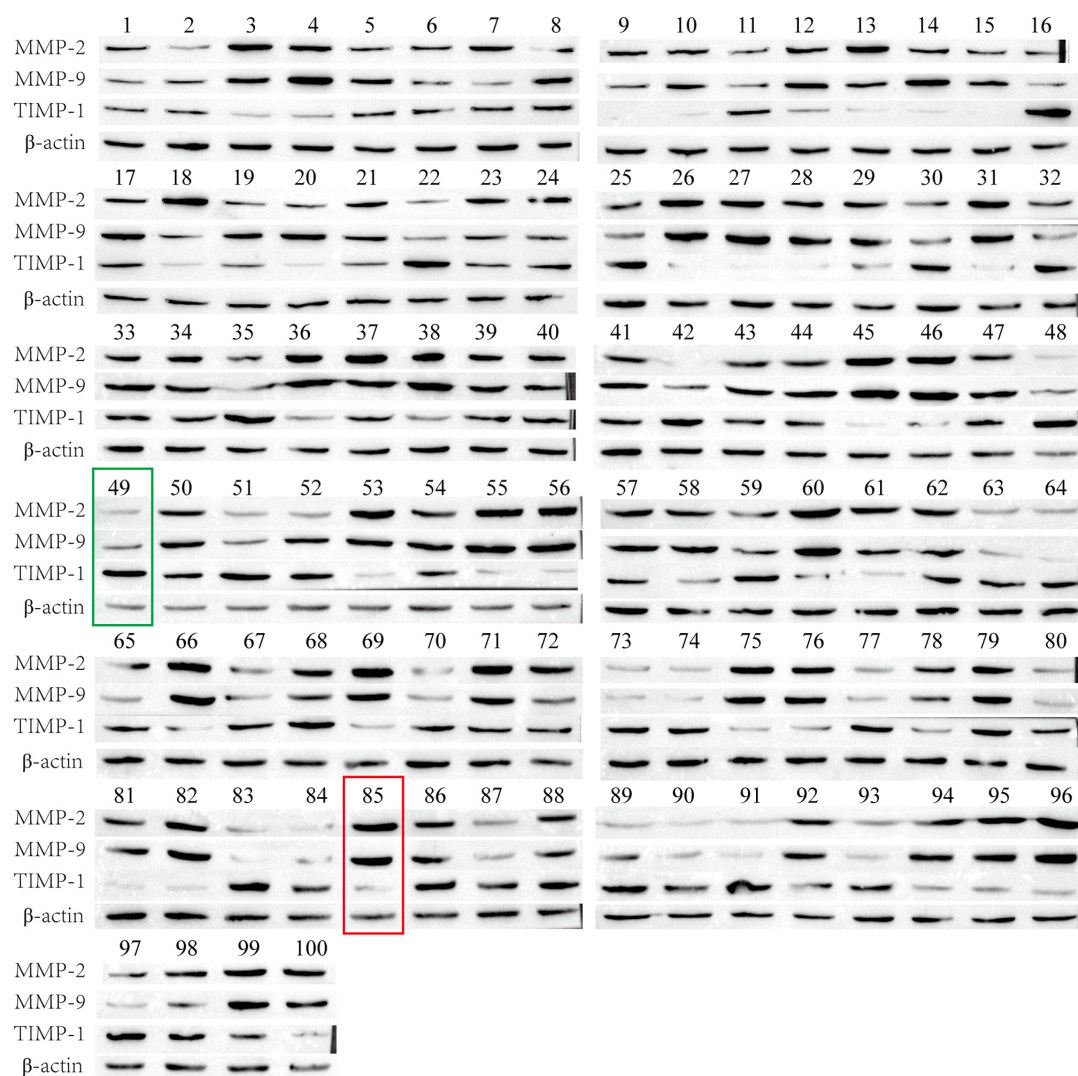

Supplement: Supplementary file 1 [file downloadSupplementary]
